# Supplementary material
Source: PubMed Central journal article supplement (PMC2678230)
Supplement: tjp0587-1619-SD1.pdf [file tjp0587-1619-SD1.pdf]

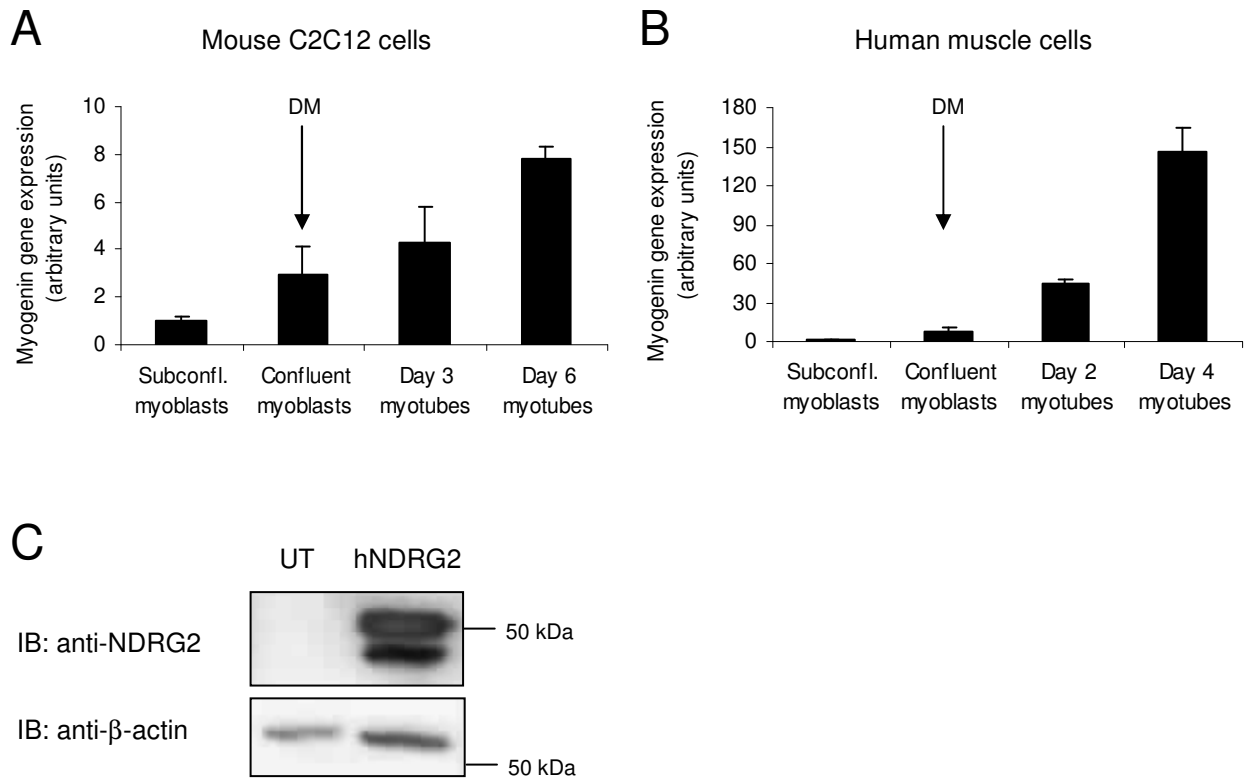

*Suppl. Fig. 1. Myogenin gene expression in differentiating myoblasts.* Fold-change in gene expression of myogenin in a time-course representing differentiating (A) mouse C2C12 myoblasts and (B) human myoblasts. Differentiation media (DM) were added when myoblasts were confluent. C. Immunoblotting (IB) analysis of 0.5  $\mu$ g protein lysates from untransfected (UT) and pCMV-human NDRG2 (hNDRG2)-transfected C2C12 myoblasts using anti-NDRG2 and anti- $\beta$ -actin antibodies.

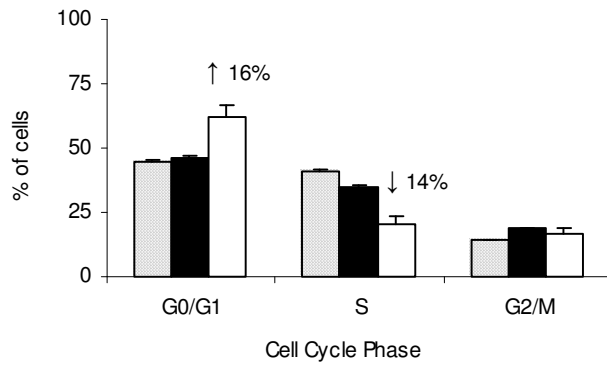

*Suppl. Fig. 2. Cell cycle progression in NDRG2-deficient C2C12 myoblasts. Cell cycle analysis of uninfected (pale grey bars), shNeg- (black bars), or shNb- (white bars) infected myoblasts. The percentage change (increase ↑ or decrease ↓) in shNb cell number is indicated above the white bars. Each phase of the cell cycle is represented on the x-axis.*
